# Temporal patterns of spatial genetic structure and effective population size in European plaice (*Pleuronectes platessa*) along the west coast of Scotland and in the Irish Sea

Phillip C. Watts, Suzanne M. Kay, Drew Wolfenden, Clive J. Fox, Audrey J. Geffen, Stephen J. Kemp, and Richard D. M. Nash

Watts, P. C., Kay, S. M., Wolfenden, D., Fox, C. J., Geffen, A. J., Kemp, S. J., and Nash, R. D. M. 2010. Temporal patterns of spatial genetic structure and effective population size in European plaice (*Pleuronectes platessa*) along the west coast of Scotland and in the Irish Sea. – ICES Journal of Marine Science, 67: 607–616.

The European plaice (*Pleuronectes platessa*) is a relatively mobile flatfish species, and previous studies have reported broad-scale genetic homogeneity among samples distributed throughout much of its northern European range, with no evidence for isolation-by-distance (IBD) population structure. Using microsatellite loci, the pattern of spatial genetic structure and effective population size is characterized for >800 plaice collected from locations off the west coast of Great Britain over a 3-year period (2001–2003). The plaice populations are characterized by weak spatial genetic structure, consistent with tagging data, and relatively low effective population sizes. In contrast to previous work, a pattern of isolation by distance is present among pairs of plaice from within each sampling period. However, IBD spatial structure was not observed for comparisons of plaice from different sampling years or using the entire dataset, indicating a patchy temporal genetic structure. Therefore, pooling the data from several years can mask subtle patterns of population structure and potentially confound estimation of other important demographic parameters, such as effective population size.

**Keywords:** effective population size, fishery, isolation by distance, population structure, spatial autocorrelation.

Received 26 May 2009; accepted 9 November 2009; advance access publication 16 December 2009.

P. C. Watts, S. M. Kay, D. Wolfenden, and S. J. Kemp: School of Biological Sciences, Liverpool University, Liverpool L69 7ZB, UK. C. J. Fox: The Scottish Association for Marine Science, Dunstaffnage Marine Laboratory, Oban PA34 1QA, Scotland, UK. A. J. Geffen: Department of Biology, University of Bergen, PO Box 7803, 5020 Bergen, Norway. R. D. M. Nash: Institute of Marine Research, PO Box 1870 Nordnes 5817, Bergen, Norway. Correspondence to P. C. Watts: tel: +44 151 795 4384; fax: +44 151 795 4404; e-mail: p.c.watts@liv.ac.uk.

## Introduction

Marine finfish management is underpinned by population dynamics models that are based on the concept of ideal stocks which are, in effect, isolated and self-sustaining populations (Walters and Martell, 2004). With the rapid advances in molecular biology techniques, it has become routine to use high-resolution genetic markers to determine patterns of gene flow and, therefore, to define biological stocks. Indeed, several studies have uncovered some degree of genetic structure among allopatric populations of marine fish that are indicative of separate stocks (O'Connell *et al.*, 1998; Castillo *et al.*, 2005), but typically there is little evidence of strong genetic differences (e.g. Hoarau *et al.*, 2002b; Watts *et al.*, 2004; Mariani *et al.*, 2005; Carlsson *et al.*, 2006; Pampoulie *et al.*, 2007). Although the studies just listed may be in accordance with the view that the marine environment lacks significant barriers to organisms with dispersive life histories, this idea is challenged by marine ecologists, who point out that many oceanographic features can limit dispersal (Jørgensen *et al.*, 2005a; Gallindo *et al.*, 2006; Hansen and Hemmer-Hansen, 2007).

Even in the absence of specific features that restrict dispersal, spatial genetic structure is expected to develop where there is gene flow between neighbouring areas—the isolation-by-distance (IBD) model of population structure described by Wright

(1943). Under IBD, the magnitude of genetic differences between pairs of populations (or individuals along a continuum) increases with spatial separation. As the dispersal capabilities of most species are less than their geographic ranges, IBD is expected to be at an appropriate spatial scale, but actually is rarely detected among marine teleost populations (Hoarau *et al.*, 2002b; Knutsen *et al.*, 2003; McPherson *et al.*, 2004; Jørgensen *et al.*, 2005a). An obvious reason for this is that the species are mobile, so a significant proportion of the fish stray to non-neighbouring populations. Alternatively, there may have been insufficient time for populations to reach genetic equilibrium, for instance, because the species has undergone a recent range expansion (Slatkin, 1993) or exists as a metapopulation (Hanski, 2003). Moreover, IBD can be overlooked simply because too few samples were analysed to attain statistical rigour (Watts *et al.*, 2007a). One strategy to extricate the actual signal of gene flow, particularly for species with weak population structure, is to quantify the observed pattern of spatial genetic structure between temporally replicated samples (Waples, 1998; McPherson *et al.*, 2004), although this practice is not employed routinely. Clearly, caution is needed when inferring patterns of gene flow in cases where few genetic differences have been uncovered.

The European plaice (*Pleuronectes platessa*) is a widely distributed flatfish found in waters shallower than 200 m from the English Channel to as far north as Iceland and Norway. Around the UK, it is heavily exploited, and some stocks are considered to be below safe biological limits (www.ices.dk). Movements of adult plaice around the UK are reasonably well understood, based on extensive tagging programmes (Dunn and Pawson, 2002; Hunter et al., 2003, 2004), and the dispersal of eggs and larvae has been studied using particle-tracking models (de Graaf et al., 2004; Fox et al., 2006, 2009). These data indicate that although the majority (e.g. 100% of tagged female plaice in one study; Hunter et al., 2003) of adults remain faithful to spawning areas, a significant proportion of adult plaice nonetheless move between management units (Dunn and Pawson, 2002; Kell et al., 2004), with consequent management implications (Kell et al., 2004). Moreover, eggs and larvae from different spawning grounds may be transported to the same nursery grounds, where the juveniles mix and may join other populations (Dunn and Pawson, 2002; Fox et al., 2009).

High levels of prerecruit dispersal combined with significant adult straying would suggest that genetic structuring in plaice should be weak. This statement seems to be confirmed by Hoarau et al. (2002b), who failed to find significant genetic differences throughout much of the northern European range of plaice, except for the Icelandic stock which is isolated by deep water, leading to the hypothesis that the species constitutes panmictic (or nearly panmictic) units at large spatial scales (the North Sea Basin). Subsequently, Hoarau et al. (2005) reported effective population sizes ( $N_e$ ) of the North Sea and Icelandic plaice stocks that were several orders of magnitude less than the adult census abundance ( $N$ ). In essence,  $N_e$  is a measure of the reproductively successful population rather than of all the fish present. This is a critical distinction, because it is the former and not the latter that determines the rate of loss of genetic diversity and therefore the associated risk of extinction (Saccheri et al., 1998) and level of evolutionary potential (Franklin, 1980). Despite this, fishery management operates on  $N$ , which may put even greater strain on the reproductive fraction of the population. A crucial assumption of any genetic method used to estimate  $N_e$  is that the sample of genotypes is representative. It is significant, therefore, that our current understanding of the population structure of North Atlantic European plaice has several limitations. First, thorough sampling of many potential plaice populations within a relatively limited area has not been undertaken. Second, the analysis of populations has not been repeated for successive years to assess the level of temporal stability to population structure. Third, relatively little is known about the population structure of stocks to the west of Great Britain: Hoarau et al. (2002b) collected one sample from the Irish Sea and one from Oban (west coast of Scotland). The study by Watts et al. (2004) did not uncover significant spatial genetic structure within the Irish Sea, but sample sizes were too limited to draw robust conclusions.

The objectives of this paper are (i) to quantify the pattern of localized spatial genetic differentiation in European plaice and to contrast this with the apparent homogeneity throughout much of northern Europe, (ii) to assess the degree of temporal stability in any population structure, and (iii) to estimate the effective population size of plaice stocks in the Irish Sea and west of Scotland.

## Material and methods

### Fieldwork and genotyping

Juvenile plaice were sampled from inshore nursery grounds along the west coast of Great Britain between 2001 and 2003 (Figure 1); the numbers collected are listed in the Appendix. Samples along the Scottish coast were collected with a 1.5-m beam trawl towed 0.5 m deep, parallel with the shore, and samples from the Irish Sea were collected using 1.5- or 2-m beam trawls towed from 100 m offshore (maximum 1.5 m deep) on to the beach (Fox et al., 2007). The position of each sample was recorded using GPS, except the collections from the Irish Sea (2001) that were taken from several sites within one of six distinct zones (Figure 1). For spatial statistics purposes, these samples were allocated coordinates at the centre of the sample zone. Whole fish were stored in absolute ethanol until processing.

Genomic DNA was extracted using a high salt protocol (Sambrook and Russell, 2000) from muscle tissue. Plaice were genotyped at nine microsatellite loci (LIST1-001, LIST1-003, LIST1-007, LIST1-009, LIST1-010, *PI06*, *PI09*, *PI92*, *PI115*) characterized by Watts et al. (1999, 2001) and Hoarau et al. (2002a). Between 10 and 50 ng of DNA was used in a 10  $\mu$ l PCR containing 75 mM Tris-HCl pH 8.9, 20 mM  $(\text{NH}_4)_2\text{SO}_4$ , 0.01% v/v Tween-20, 0.2 mM each dNTP, 1.5–3.0 mM  $\text{MgCl}_2$ , 2 pmol of each primer, and 0.25 U *Taq* polymerase (ABgene). Forward primers were 5'-labelled with either 6-FAM, NED, PET, or VIC fluorophores (Applied Biosystems). Thermal cycling conditions are described by Watts et al. (1999, 2001) and Hoarau et al. (2002a). PCR products were pooled into one of two genotyping panels along with a GENESCAN-500 LIZ size standard (Applied Biosystems), then separated by capillary electrophoresis through a denaturing polymer on an ABI3100 automated sequencer (Applied Biosystems). Allele sizes were determined using the cubic model of analysis in GENEMAPPER software (Applied Biosystems).

### Statistical analysis of genetic data

Genotypes were examined for the presence of null alleles, potential mis-scoring attributable to stutter bands and/or PCR bias against amplification of larger alleles using MICROCHECKER (Van Oosterhout et al., 2003). *FSTAT* ver. 2.9.3 (Goudet, 1995) software was used to calculate indices of genetic diversity: the number of alleles ( $N_a$ ), observed heterozygosity ( $H_o$ ), expected heterozygosity ( $H_e$ ), and Wright's (1951) inbreeding coefficient ( $f$ ), which was estimated using the method of Weir and Cockerham (1984). The significance of any departures from expected Hardy-Weinberg equilibrium conditions was assessed by permuting alleles among individuals within samples (1000 permutations) using *FSTAT*. Genotypic linkage equilibrium among all locus-pair combinations was determined for the pooled dataset within each sampling period using the log-likelihood ratio  $G$ -statistic in *FSTAT*. Sequential Bonferroni corrections for  $k$  multiple tests were applied where appropriate (Rice, 1989).

Population subdivision was characterized for each locus and as an average over all loci by calculating  $\theta$ , Weir and Cockerham's (1984) unbiased estimator of Wright's (1951)  $F_{ST}$ , using *FSTAT*. The 95% confidence intervals about estimates of  $\theta$  were generated by jackknifing over loci (Goudet, 1995).

Genetic differentiation under IBD is expected to increase linearly with spatial distance in a one-dimensional habitat, and linearly with the logarithm of spatial separation in two-dimensional

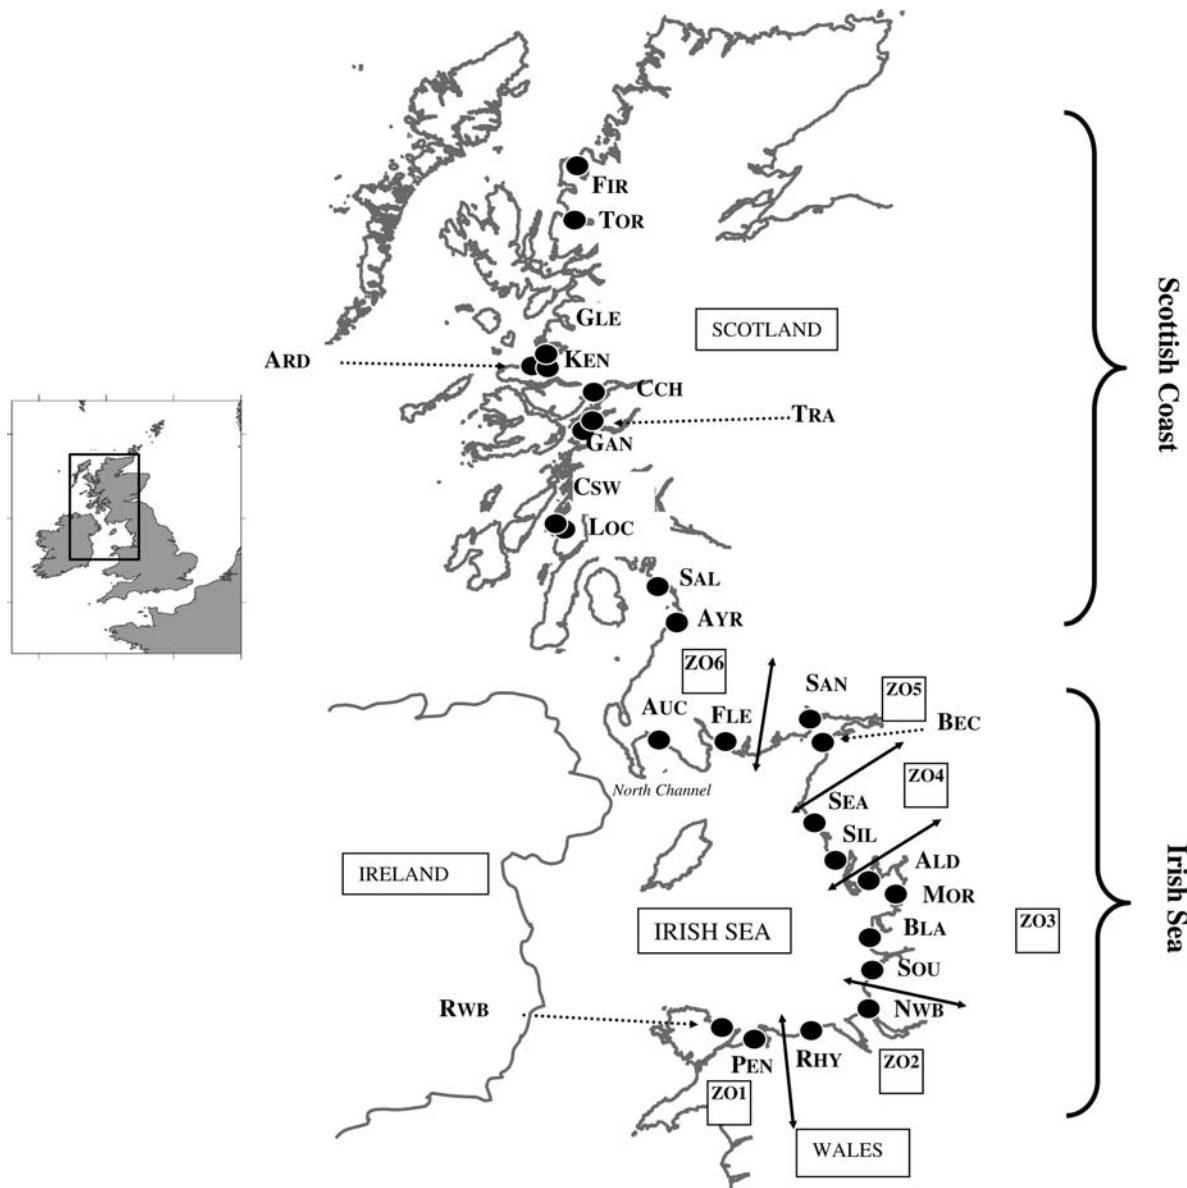

**Figure 1.** Sample locations for juvenile plaice, *P. platessa*, collected during the years 2001–2003. The three-letter code for each location is used to identify samples in the Appendix, with zones around the Irish Sea identified for 2001 samples by ZO1–ZO6.

space (Rousset, 1997). Although our sample sites are (roughly) linearly distributed, the appropriate treatment to account for the surrounding matrix of other (unsampled) plaice populations from west of our sample sites, i.e. off the Irish coast, is that of a two-dimensional population matrix. The strength of any IBD was examined by regression of estimates of genetic differentiation among pairs of samples, defined by  $F_{ST}/(1 - F_{ST})$ , against the corresponding distances ( $\ln m$ ) separating them (Rousset, 1997); values of  $F_{ST}/(1 - F_{ST})$  were calculated using the online version (3.1c, <http://wbiomed.curtin.edu.au/genepop/>) of GENEPOP (Raymond and Rousset, 1995), with the significance of any correlation between genetic differentiation and geographic distance assessed by the Mantel test (1000 permutations of population locations among all locations). Distances between individuals and samples were the shortest marine route between sample locations.

IBD was also investigated by spatial autocorrelation, a technique that yields information about the pattern and scale of spatial structure and has proved to be sensitive at recovering fine-scale genetic structure (Vekemans and Hardy, 2004). To determine whether any genetic structure was temporally stable, we restricted comparisons among individuals that were collected either within or between each sampling period (year). For each treatment, the variation in average kinship among individuals ( $F_{ij}$ ; Loiselle *et al.*, 1995) was estimated across a range of spatial scales using SPAGeDI version 1.2 (Hardy and Vekemans, 2002). Average (over all loci) correlograms are presented to avoid variation in correlogram profiles based on the frequencies of individual alleles subject to stochastic processes. Standard errors for average  $F_{ij}$  were generated by jack-knifing over loci, and the significance of average estimates of  $F_{ij}$  was calculated by making 1000 permutations of spatial group locations among spatial groups within category.

A point estimate of short-term effective population size ( $N_e$ ) was calculated from the strength of linkage disequilibrium (LD; Hill, 1981) using Waples' (2006) correction for a downward bias that occurs when the sample size is small relative to  $N_e$ . Briefly, the LD method of estimating  $N_e$  is based on the premise that if there is no immigration, population substructure or selection and the genetic sample is representative, then genetic drift in a finite population generates a measurable correlation between alleles among different loci that informs on the  $N_e$ . Estimates of  $N_e$  were computed using LDNe ver. 1.31 (Waples and Do, 2008) for pooled samples (within each year) from two distinct areas, the Irish Sea and the Scottish coast, that are separated by the narrow North channel (Figure 1). For this analysis, we assumed random mating populations and calculated parametric 95% confidence intervals using Equation (12) of Waples (2006). Estimates of  $N_e$  were calculated using the subset of six loci that are unlinked and do not suffer from null alleles (see below).

### Estimates of plaice population size in the Irish Sea and west coast of Scotland

ICES carries out annual analytical stock assessments of the Irish Sea plaice stock (Division VIIa; ICES, 2006) based upon commercial catch data and a dedicated beam trawl survey. Estimates of spawning–stock biomass (t) and the numbers of fish at age for years 2001–2005 were taken from the latest available assessment. There is no formal assessment of the status of plaice for the west of Scotland, but a groundfish survey using a Grande Overture Verticale (GOV) trawl is conducted annually in the first quarter of each year. That survey also includes a number of stations in the Irish Sea (VIIa). Although not an ideal gear for sampling flatfish, the GOV trawl does catch plaice. Catch data were obtained from Marine Scotland, Aberdeen, and an approximate estimate of the status of plaice west of Scotland obtained by scaling the data from the formal VIIa assessment by the ratio of mean catches in Division VIa for stations east of 8°W and between 55 and 58.5°N to the mean catch in Division VIIa.

## Results

### Genetic diversity

We genotyped 864 plaice at nine microsatellite loci. One pair of loci (LIST1-009 and LIST1-010) demonstrated significant ( $p < 0.05$ ,  $k = 36$ ) linkage disequilibrium in all three temporal samples; because LIST1-009 was weakly polymorphic, it was omitted from subsequent analyses. There was no evidence for mis-scoring of genotypes as a consequence of stutter bands or large allele dropout, but several loci apparently suffer from null alleles: for the two loci *PI06* and *PI09*, there was evidence of nulls in almost all (97 and 89%, respectively) of the 38 tests, whereas at two other loci (*PI92* and *PI115*), roughly one-quarter of the samples may have been affected by null alleles. Null alleles were not a problem for the remaining loci. Therefore, the subset of six loci, LIST1-001, LIST1-003, LIST1-007, LIST1-010, *PI92*, and *PI115*, was selected as a panel of unlinked genetic markers that are unaffected by non-amplifying alleles. Only these genetic markers were used for genetic analyses.

Raw data on basic measures of genetic diversity at LIST1-001, LIST1-003, LIST1-007, LIST1-010, *PI92*, and *PI115* are provided in the Appendix. Briefly, the number of alleles over all samples varied from a moderate 8 (LIST1-007 and LIST1-010) to a maximum of 61 (*PI92*). Within samples, the number of alleles

ranged between 2 and 10 at four loci (LIST1-001, LIST1-003, LIST1-007, and LIST1-010), and between 3 and 21 at two loci (*PI92* and *PI115*); therefore, average levels of gene diversity  $H_e$  (over all samples) were greater in the last two loci ( $H_e = 0.89$  and  $0.69$ ) than in the other four ( $H_e = 0.62$ ,  $0.44$ ,  $0.41$ , and  $0.53$ ). The  $f$  values of most locus–sample combinations were not significantly different from zero ( $p > 0.05$ ,  $k = 38$  tests per locus), but the most polymorphic locus (*PI92*) had significant heterozygote deficits in four samples (Appendix). The average  $f$  over all loci varied from  $-0.098$  (SAL 2001) up to  $0.423$  (FIR 2001), but was  $< 0.1$  for most (79%) samples.

### Spatio-temporal genetic structure

Overall level of genetic differentiation was weak, with all fixation indices below 0.007. The variance of  $F_{ST}/(1 - F_{ST})$  increased with the distance separating populations (Figure 2), which is a qualitative pattern of IBD genetic structure. Although regressions of  $F_{ST}/(1 - F_{ST})$  against spatial separation produced weak positive slopes, neither the 2001 samples (there were too few samples to analyse the 2002 and 2003 datasets individually) nor the entire dataset demonstrated a statistically significant relationship ( $p = 0.50$  and  $0.34$ , respectively). The results were the same when all loci were included in the analyses (data not shown).

Neighbouring plaice were genetically more alike than were pairs of more distantly separated individuals. Average kinship ( $F_{ij}$ ) between pairs of fish from the same sample period was significantly ( $p < 0.05$ ) greater than zero in the first distance category (up to 10 km separation). There was a significant ( $p = 0.0021$ ,  $r^2 = 0.814$ ) linear decline in average kinship ( $F_{ij}$ ) with increasing (logarithm of) distance among individuals, with the first three distance classes (up to  $\sim 60$  km) having positive values of  $F_{ij}$  (Figure 3a). In contrast, no significant spatial trend in the level of  $F_{ij}$  (i.e. no pattern of IBD) was observed when the analysis was restricted to pairs of plaice collected from different sample periods (Figure 3b) or when the entire dataset was analysed (Figure 3c).

### Effective population size

Estimates of  $N_e$  for the samples of Irish Sea plaice were  $\sim 700$  (during 2001 and 2003, but could not be determined during 2002) and were noticeably lower ( $\sim 40$ ) for plaice from the

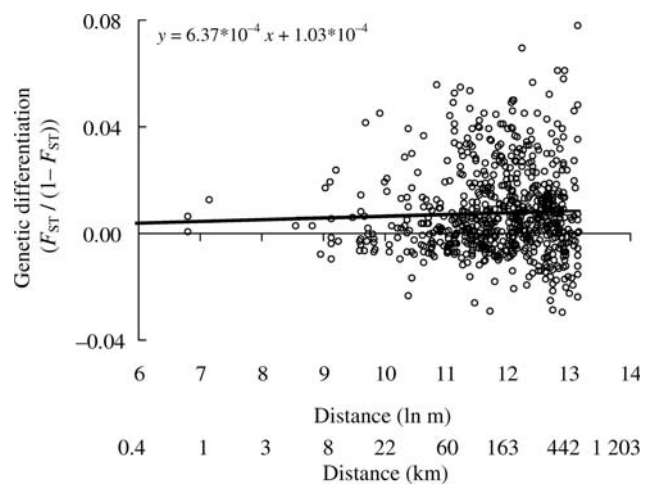

**Figure 2.** Relationship between the level of genetic differentiation ( $F_{ST}/(1 - F_{ST})$ ) between pairs of samples and their distance of separation.

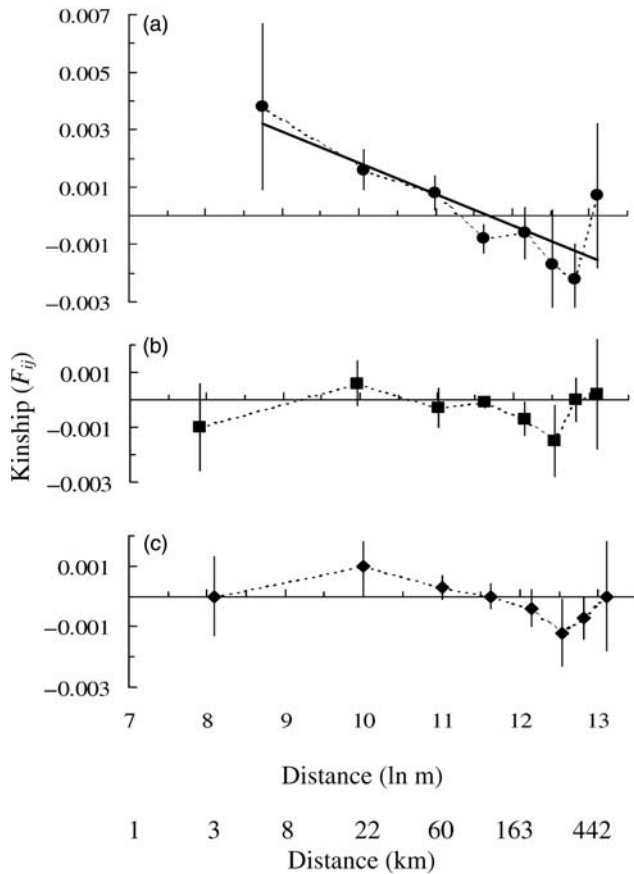

**Figure 3.** Correlogram of the combined genetic correlation in kinship ( $F_{ij}$ ; Loiselle *et al.*, 1995) as a function of average spatial separation for pairs of juvenile plaice, from inshore areas off the western coast of Great Britain. Analysis using (a) pairs of individuals within the same sampling period only, (b) pairs from different sampling periods, and (c) the entire dataset.

Scottish coast (2001 only). Pooling all samples (in 2001) from the Irish Sea and Scottish coast provided an estimate of  $N_e \sim 90$ , which was substantially lower than the estimates of  $N_e$  for the Irish Sea alone. From approximate adult censuses ( $N$ ), the  $N_e/N$  ratio for all samples is well below 1, typically in the order of  $10^{-5}$  (Table 1).

**Discussion**

We found generally weak or non-significant spatial genetic structure among populations of plaice from the western coast of Great

**Table 1.** Estimates of effective population size ( $N_e$ ) ( $\pm$  95% CI) and approximate total numbers of adults ( $N$ ) of plaice, *P. platessa*.

| Sample         | $N_e$ | -95% CI | +95% CI | $N$        | $N_e/N$               |
|----------------|-------|---------|---------|------------|-----------------------|
| 2001 All       | 89.1  | 75.6    | 105.3   | 18 925 684 | $0.47 \times 10^{-5}$ |
| 2001 Scotland  | 36.9  | 31.7    | 42.9    | 1 683 464  | $2.19 \times 10^{-5}$ |
| 2001 Irish Sea | 648.9 | 289.7   | Inf.    | 17 242 220 | $3.76 \times 10^{-5}$ |
| 2002 Irish Sea | -     | -       | -       | 20 924 870 | -                     |
| 2003 Irish Sea | 774.4 | 289.0   | Inf.    | 25 840 220 | $3.00 \times 10^{-5}$ |

$N_e$  was estimated from single generation samples using the corrected linkage disequilibrium method of Waples (2006).

Britain, similar to that reported for populations of this species from the continental shelf of northern Europe (Hoarau *et al.*, 2002b; Watts *et al.*, 2004). However, beneath this weak spatial genetic structure lies a subtle annual pattern of IBD that has not been reported for the species and which may impact upon the assumption that the species comprises a single, broad panmictic unit in northern European seas (excluding the Icelandic stock).

**Spatial genetic structure**

Adult plaice are capable of long-distance movement (Metcalf and Arnold, 1997; Hunter *et al.*, 2004), but generally return to the spawning site where they were tagged (Hunter *et al.*, 2003). The mechanisms by which juvenile plaice locate spawning grounds are not known, but immature fish probably learn the migration routes from adults (Arnold and Metcalfe, 1996), rather than possessing an innate natal homing instinct. Stochastic attachment of juveniles to adults from different spawning areas would lead to gene flow among spawning stocks even if mature fish subsequently used one spawning ground only. In addition to a possible juvenile dispersal phase, the opportunity for straying between spawning grounds, despite evidence for homing, has been identified by conventional tagging (Dunn and Pawson, 2002), and with rates sufficiently high to prevent genetic divergence through genetic drift alone. Therefore, the overall weak spatial genetic structure reported here is consistent with the known dispersal characteristics of this species, particularly the level of mixing between Irish Sea plaice stocks reported by Dunn and Pawson (2002). Moreover, the gradual decline in  $F_{ij}$  points to IBD rather than any specific barrier to gene flow in the study region; as such, there is no evidence that the narrow North Channel (Figure 1) acts as a substantive barrier to movement by plaice from the Irish Sea and the west coast of Scotland.

That juvenile plaice are characterized by IBD within a sampling year points to restricted gene flow in this sample area. Extremely localized retention, and therefore sampling, of fish from just a few families would generate high genetic similarities at small distance classes, but this phenomenon may be expected to exhibit a patchy genetic structure at broader scales (owing to chance sampling effects) rather than the consistent linear decline in relatedness observed here (Figure 3a). IBD has been reported for some marine teleost populations (Pogson *et al.*, 2001; O'Reilly *et al.*, 2004), but, as stated earlier, IBD is not usually detected and it was not reported for plaice stocks sampled across much of its northern European range (Hoarau *et al.*, 2002b). On the one hand, this difference in observed spatial genetic structure may reflect our sampling of juveniles that have travelled a limited distance from spawning grounds (see below), whereas Hoarau *et al.*'s (2002b) sample of adults comprised mainly non-spawning fish from feeding grounds and therefore potentially sampled mixed stocks [note that Hoarau *et al.* (2002b) analysed both adults and juveniles]. However, a similar contrast in the pattern of spatial genetic structure at relatively limited and broader geographic scales has been uncovered during extensive research into two of the most important commercially exploited teleosts in the North Atlantic, cod *Gadus morhua* (Bentzen *et al.*, 1996; Ruzzante *et al.*, 1996, 1997; Hutchinson *et al.*, 2001; Pogson *et al.*, 2001) and herring *Clupea harengus* (Shaw *et al.*, 1999; Mariani *et al.*, 2005; Jørgensen *et al.* 2005b). That the pattern of spatial structure depends on spatial scale likely reflects greater, and possibly more predictable, rates of gene flow at local scales and a more rapid approach to genetic equilibrium conditions (Crow and Aoki,

1984; Slatkin, 1993). Together, these studies demonstrate that a single genetic survey at a broad spatial scale can be misleading and underscores the need for repeated temporal sampling of marine teleost populations to provide meaningful appraisals of their stock structure.

To the west of the British Isles, plaice are formally assessed and managed as discrete stocks in the Western Channel, Celtic Sea, and Irish Sea ([www.ices.dk](http://www.ices.dk)). Plaice to the west of Scotland are not an important component of commercial catches, so there is no formal management of the stock in that area, and there are no data on the level of mixing between the Irish Sea and west coast of Scotland. Within the eastern Irish Sea and west of Scotland, we failed to find discrete genetic boundaries corresponding to distinct stocks, but our results demonstrate that the management unit is also not a single, panmictic stock. Aside from potential dispersal by juveniles and/or adults, the pattern of IBD is consistent with results from a recently developed particle-tracking model for the Irish Sea ([van der Molen et al., 2007](#)), where the modal distance eggs and larvae are transported is  $\sim 80$  km. On the west coast of the British Isles and in the Irish Sea in particular, the duration of the pelagic egg and larva phase is of the order of 50–70 d ([Nash, 1998](#); [Fox et al., 2009](#)), so given the prevailing oceanography during early spring, the distances between spawning and settlement on the nursery grounds are, in general, relatively short ([Fox et al., 2007, 2009](#)). Therefore, our sampling reflects genetic differences between recruits from spawning grounds off the western British Isles; the pattern of IBD indicates dispersal mainly between neighbouring areas. The results from these particle models also demonstrate transport of eggs and larvae from the western Irish Sea to the east (see also [Watts et al., 2004](#); [Fox et al., 2009](#)), and that eggs and larvae could be moved north through the North Channel under certain meteorological conditions, consistent with our genetic data and providing a pre-cruit mechanism for dispersal ([Fox et al., 2009](#)). Given improved knowledge of mixing rates between fish populations, it is relatively easy to set up management simulation models to investigate the impacts on management advice (see [Kell et al., 2009](#), for issues relating to herring stocks west of the British Isles). Although this has been undertaken for plaice in the North Sea and Eastern Channel ([Kell et al., 2004](#)), this approach has not yet been applied to plaice stocks to the west of the UK.

The distinction between methods used to detect IBD (cf. Figures 2 and 3a) is interesting because most studies determine the strength of IBD from the pattern of genetic differentiation among pairs of populations. One likely reason for the wide variance in estimates of  $F_{ST}/(1 - F_{ST})$  is when the distance between sample pairs does not reflect the distance travelled by dispersing individuals. To some extent, this imprecision may have less effect when using autocorrelation because data are placed into distance classes. Nonetheless, as we estimated the shortest marine route between sample sites, perhaps the patterns of movement among plaice stocks are more complex. Moreover, IBD may not be detected when too few populations are sampled to provide sufficient statistical power. In this study, we found a qualitative pattern of IBD (i.e. an increase in the variance) among estimates of differentiation among pairs of populations (Figure 2), but the regression slope was non-significant. Certainly, other studies have found greater statistical power to detect IBD associated with analyses based on genetic relationships among individuals rather than populations ([Castric and Bernatchez, 2004](#); [Watts et al., 2007a](#)).

## Temporal genetic structure

An absence of IBD between samples from different sample periods (Figure 3b and c) is indicative of annual variation in the genetic composition of juvenile plaice; such temporal genetic patchiness appears to be a relatively common feature of populations of marine species ([Larson and Julian, 1999](#)). Crucially, when samples were combined across years, the subtle IBD spatial genetic structure was masked. [Hoarau et al. \(2002b\)](#) analysed samples that were collected from several years which, in addition to the issues discussed above, may account for the failure to detect IBD.

Reasons for temporal variation in genetic structure generally are not known, but typically are believed to reflect the chance survival of just a small fraction of individuals from a much larger pool of offspring (reviewed by [Larson and Julian, 1999](#)). Other explanations lie in social structure and breeding behaviour. For example, spawning aggregations of cod are not simple, random mating units, but involve complex lekking behaviour that allows dominant males to fertilize most eggs ([Morgan and Trippel, 1996](#); [Rowe et al., 2004](#)). Similarly, some Atlantic herring populations apparently form genetically discrete spawning waves ([McPherson et al., 2003](#); [Jørgensen et al., 2005b](#)). In addition, a recent work has implicated selective mortality as an example of a process that can alter gene frequencies between annual cohorts ([Vigliola et al., 2007](#)). Whatever the mechanism, young plaice at a particular nursery ground are the progeny of a relatively small fraction (compared with the number of mature adults) of the available breeding individuals (see the discussion on effective population size below), and the transient IBD genetic structure indicates that the success of these individuals varies annually. Determining the relative importance of potential stochastic or deterministic factors that cause variance in the composition of the breeding population, and hence prevent temporal stability in gene frequencies, clearly would help better understand demographic processes relevant to the management of European plaice.

## Effective population size

That our estimates of  $N_e$  varied between years and could not be resolved for one sample (Table 1) may reflect some of the biases and imprecision associated with single generation estimates of  $N_e$  ([Frankham, 1995](#)), although the use of large sample sizes and at least six loci may provide reasonable estimates of  $N_e$  with the linkage disequilibrium method ([Bartley et al., 1992](#)). Alternatively, the apparent variation in  $N_e$  may reflect temporal changes in the size of the successful breeding population attributable to variable survivorship of planktonic eggs and larvae (possibly reflecting, for example, annual variations in weather conditions or food availability), but it has to be stressed that further work is essential to corroborate this, because the variation could reflect different sampling strategies. Even if the estimates of  $N_e$  are reasonable, it is important to make the contrast between this parameter (an indication of the successful breeding population) and the total adult population size that may not fluctuate in the same way.

Bearing in mind the well-documented limitations of single-generation methods of estimating  $N_e$ , the estimated  $N_e$ s of Irish Sea and Scottish populations of plaice are low. The  $N_e/N$  ratios in the order of  $10^{-5}$  (Table 1) are comparable with values reported for other marine teleosts ([Hauser et al., 2002](#); [Turner et al., 2002](#);

Hutchinson *et al.*, 2003), including the Icelandic and North Sea plaice stocks (Hoarau *et al.*, 2005). A reduction in  $N_e$  is typically attributed to some combination of three factors, (i) uneven sex ratio, (ii) population fluctuations, or (iii) variance in reproductive success (Frankham, 1995), with the latter, in particular, thought to be typical of many marine teleosts that are highly fecund, have complex mating behaviours, and experience high mortality and stochastic survival of planktonic eggs and larvae (i.e. a type III survivorship curve).

Although a low  $N_e$  may make biological sense for plaice, it is essential to note that one assumption of the LD (like many other) method of estimating  $N_e$  is that the population is closed and, given putative mobility of eggs, larvae, juveniles, and adult plaice, this does not seem likely for many plaice stocks. The impact of immigration on these estimates of  $N_e$  depends on the genetic composition of immigrants (Fraser *et al.*, 2007; Chevolut *et al.*, 2008); indeed, a comparison of the LD method with other methods of estimating  $N_e$  that account for dispersal failed to find a systematic bias (Watts *et al.*, 2007b). The clear difference in the estimates of  $N_e$  for the Irish Sea samples and that of the entire study region (cf. Table 1) highlights the impact of the scale of sampling upon estimates of  $N_e$  (and the ratio  $N_e/N$ ), and the issue of spatial structure within a large population that lacks obvious genetic boundaries. Therefore, another crucial implication of subtle population structure is that an apparently homogeneous population may not be strictly panmictic. This is important because estimates of  $N_e$  require a sample of representative genotypes, which is straightforward to collect when a population is truly mixed. Failure to recognize subtle population structure will lead to the signal of genetic drift that is used to estimate  $N_e$ , i.e. the temporal variation in allele frequencies, being confounded with differences arising from spatial genetic variation, so generating inaccurate estimates of  $N_e$ . It is relevant therefore that the contemporary “North Sea” sample used by Hoarau *et al.* (2005) was collected from a limited area (two nursery grounds in the Dutch Wadden Sea), whereas the historical samples were sourced more generally from “the North Sea”. To what extent the temporal variance in allele frequencies among samples reflects divergence because of IBD spatial structure rather than genetic drift, i.e. the  $N_e$ , requires further study before management plans are adopted to account for an apparently severely reduced  $N_e$ .

To summarize, plaice populations along the west coast of Great Britain are characterized by IBD genetic structure against a background of weak spatial genetic differentiation. This pattern of spatial genetic structure agrees with our current understanding of the dispersal characteristics of plaice, although we cannot yet partition the relative importance of different stages in its life history. Our data contrast with previous work that reported broad-scale genetic homogeneity among samples of plaice throughout much of its northern European distribution, and an absence of IBD. Our results also raise questions about the validity of present estimates of  $N_e$  for populations of mobile marine species that lack clear genetic boundaries. Clearly, it is essential to determine whether representative genetic samples have been taken before such data are used for genetic management and conservation. Despite this, it appears likely that the  $N_e$  values of plaice populations are several orders of magnitude lower than the adult censuses, which is typical of highly fecund species.

### Acknowledgements

The work was funded by the University of Liverpool research development fund, and collection of samples within the Irish

Sea was done under Defra project MF0423. Samples from Scotland were kindly provided by Tim Targett (University of Maryland), Mike Burrows, and Bob Batty (SAMS, Oban, Scotland).

### References

- Arnold, G. P., and Metcalfe, J. D. 1996. Seasonal migrations of plaice (*Pleuronectes platessa*) through the Dover Strait. *Marine Biology*, 127: 151–160.
- Bartley, D., Bagley, M., Gall, G., and Bentley, B. 1992. Use of linkage disequilibrium data to estimate effective size of hatchery and natural fish populations. *Conservation Biology*, 6: 365–375.
- Bentzen, P., Taggart, C. T., Ruzzante, D. E., and Cook, D. 1996. Microsatellite polymorphism and population structure of Atlantic cod (*Gadus morhua*) in the northwest Atlantic. *Canadian Journal of Fisheries and Aquatic Sciences*, 53: 2707–2721.
- Carlsson, J., McDowell, J. R., Carlsson, J. E. L., and Olasdottr, D. 2006. Genetic heterogeneity of Atlantic bluefin tuna caught in the eastern North Atlantic Ocean south of Iceland. *ICES Journal of Marine Science*, 63: 1111–1117.
- Castillo, A. G. F., Alvarez, P., and Garcia-Vazquez, E. 2005. Population structure of *Merluccius merluccius* along the Iberian Peninsula coast. *ICES Journal of Marine Science*, 62: 1699–1704.
- Castric, V., and Bernatchez, L. 2004. Individual assignment test reveals differential restriction to dispersal between two salmonids despite no increase of genetic differences with distance. *Molecular Ecology*, 13: 1299–1312.
- Chevolut, M., Ellis, J. R., Rijnsdorp, A. D., Stam, W. T., and Olsen, J. L. 2008. Temporal genetic changes in allele frequencies but stable genetic diversity over the past 40 years in the Irish Sea population of thornback ray, *Raja clavata*. *Heredity*, 101: 120–126.
- Crow, J. F., and Aoki, K. 1984. Group selection for a polygenic behavioural trait—estimating the degree of population subdivision. *Proceedings of the National Academy of Sciences of the USA*, 81: 6073–6077.
- de Graaf, M., Jager, Z., Vreugdenhil, C. B., and Elorche, M. 2004. Numerical simulations of tidally cued vertical migrations of flatfish larvae in the North Sea. *Estuarine, Coastal and Shelf Science*, 59: 295–305.
- Dunn, M. R., and Pawson, M. G. 2002. The stock structure and migrations of plaice populations on the west coast of England and Wales. *Journal of Fish Biology*, 61: 360–393.
- Fox, C. J., Geffen, A. J., Taylor, N., Davison, P., Rossetti, H., and Nash, R. D. M. 2007. Birth-date selection in early life stages of plaice *Pleuronectes platessa* in the eastern Irish Sea (British Isles). *Marine Ecology Progress Series*, 345: 255–269.
- Fox, C. J., McCloghrie, P., and Nash, R. D. M. 2009. Potential transport of plaice eggs and larvae between two apparently self-contained sub-populations in the Irish Sea. *Estuarine, Coastal and Shelf Science*, 81: 381–389.
- Fox, C. J., McCloghrie, P., Young, E. F., and Nash, R. D. M. 2006. The importance of individual behaviour for successful settlement in juvenile plaice—a modelling and field study in the eastern Irish Sea. *Fisheries Oceanography*, 15: 301–313.
- Frankham, R. 1995. Effective population size/adult population size ratios in wildlife: a review. *Genetical Research*, 66: 95–107.
- Franklin, I. R. 1980. Evolutionary change in small populations. *In Conservation Biology: an Evolutionary–Ecological Perspective*, pp. 135–149. Ed. by M. E. Soulé, and B. A. Wilcox. Sinauer, Sunderland, MA.
- Fraser, D. J., Hansen, M. M., Østergaard, S., Tessier, N., Legault, M., and Bernatchez, L. 2007. Comparative estimation of effective population sizes and temporal gene flow in two contrasting population systems. *Molecular Ecology*, 16: 3866–3889.

- Gallindo, H. M., Olson, D. B., and Palumbi, S. R. 2006. Seascape genetics: a coupled oceanographic–genetic model predicts population structure of Caribbean corals. *Current Biology*, 16: 1622–1626.
- Goudet, J. 1995. *FSTAT* (vers. 1.2): a computer program to calculate *F*-statistics. *Journal of Heredity*, 86: 485–486.
- Hansen, M., and Hemmer-Hansen, J. 2007. Landscape genetics goes to sea. *Journal of Biology*, 6: 6.
- Hanski, I. 2003. *Metapopulation Ecology*. Oxford University Press, Oxford, UK.
- Hardy, O. J., and Vekemans, X. 2002. SPAGeDi: a versatile computer program to analyse spatial genetic structure at the individual or population levels. *Molecular Ecology Notes*, 2: 618–620.
- Hauser, L., Adcock, G. J., Smith, P. J., Ramirez, J. H. B., and Carvalho, G. R. 2002. Loss of microsatellite diversity and low effective population size in an overexploited population of New Zealand snapper (*Pagrus auratus*). *Proceedings of the National Academy of Science of the USA*, 99: 11742–11747.
- Hill, W. G. 1981. Estimation of effective population size from data on linkage equilibrium. *Genetical Research*, 38: 209–216.
- Hoarau, G., Boon, E., Jongma, D. N., Ferber, S., Palsson, J., van der Veer, H. W., Rijnsdorp, A. D., et al. 2005. Low effective population size and evidence for inbreeding in an overexploited flatfish, plaice (*Pleuronectes platessa* L.). *Proceedings of the Royal Society of London, B: Biological Sciences*, 272: 497–503.
- Hoarau, G., Cook, C., Stam, W. T., and Olsen, J. L. 2002a. New microsatellite markers for plaice, *Pleuronectes platessa* L. (Teleostei: Pleuronectidae). *Molecular Ecology Notes*, 2: 60–61.
- Hoarau, G., Rijnsdorp, A. D., van der Veer, H. W., Stam, W. T., and Olsen, J. L. 2002b. Population structure of plaice (*Pleuronectes platessa* L.) in northern Europe: microsatellites revealed large-scale spatial and temporal homogeneity. *Molecular Ecology*, 11: 1165–1176.
- Hunter, E., Metcalfe, J. D., Arnold, G. P., and Reynolds, J. D. 2004. Impacts of migratory behaviour on population structure in North Sea plaice. *Journal of Animal Ecology*, 73: 377–385.
- Hunter, E., Metcalfe, J. D., and Reynolds, J. D. 2003. Migration route and spawning site fidelity by North Sea plaice. *Proceedings of the Royal Society of London, B: Biological Sciences*, 270: 2097–2103.
- Hutchinson, W. F., Carvalho, G. R., and Rogers, S. I. 2001. Marked genetic structuring in localised spawning populations of cod *Gadus morhua* in the North Sea and adjoining waters, as revealed by microsatellites. *Marine Ecology Progress Series*, 223: 251–260.
- Hutchinson, W. F., van Oosterhout, C., Rogers, S. I., and Carvalho, G. R. 2003. Temporal analysis of archived samples indicates marked genetic changes in declining North Sea cod (*Gadus morhua*). *Proceedings of the Royal Society of London, B: Biological Sciences*, 270: 2125–2132.
- ICES. 2006. Report of the Working Group on the Assessment of Northern Shelf Demersal Stocks. ICES Document CM 2006/ACFM: 30.
- Jørgensen, H. B. H., Hansen, M. M., Bekkevold, D., Ruzzante, D. E., and Loeschcke, V. 2005a. Marine landscapes and population genetic structure of herring (*Clupea harengus* L.) in the Baltic Sea. *Molecular Ecology*, 14: 3219–3234.
- Jørgensen, H. B. H., Hansen, M. M., and Loeschcke, V. 2005b. Spring-spawning herring (*Clupea harengus* L.) in the southwestern Baltic Sea: do they form genetically distinct spawning waves? *ICES Journal of Marine Science*, 62: 1065–1075.
- Kell, L. T., Dickey-Collas, M., Hintzen, N. T., Nash, R. D. M., Pilling, G. M., and Roel, B. A. 2009. Lumpers or splitters? Evaluating recovery and management plans for metapopulations of herring. *ICES Journal of Marine Science*, 66: 1776–1783.
- Kell, L. T., Scott, R., and Hunter, E. 2004. Implications for current management advice for North Sea plaice. 1. Migration between the North Sea and English Channel. *Journal of Sea Research*, 51: 287–299.
- Knutsen, H., Jorde, P. E., Andre, C., and Stenseth, N. Ch. 2003. Fine-scaled geographical population structuring in a highly mobile marine species: the Atlantic cod. *Molecular Ecology*, 12: 385–394.
- Larson, R. J., and Julian, R. M. 1999. Spatial and temporal genetic patchiness in marine populations and their implications for fisheries management. *CalCOFI Reports*, 40: 94–99.
- Loiselle, B. A., Sork, V. L., Nason, J., and Graham, C. 1995. Spatial genetic structure of a tropical understorey shrub, *Psychotria officinalis* (Rubiaceae). *American Journal of Botany*, 82: 1420–1425.
- Mariani, S., Hutchinson, W. F., Hatfield, E. M. C., Ruzzante, D. E., Simmonds, E. J., Dahlgren, T. G., Andre, C., et al. 2005. North Sea herring population structure revealed by microsatellite analysis. *Marine Ecology Progress Series*, 303: 245–247.
- McPherson, A. A., O'Reilly, P. T., and Taggart, C. T. 2004. Genetic differentiation, temporal stability, and the absence of isolation by distance among Atlantic herring populations. *Transactions of the American Fisheries Society*, 133: 434–446.
- McPherson, A. A., Stephenson, R. L., and Taggart, C. T. 2003. Genetically different Atlantic herring *Clupea harengus* spawning waves. *Marine Ecology Progress Series*, 247: 303–309.
- Metcalfe, J. D., and Arnold, G. P. 1997. Tracking fish with electronic tags. *Nature*, 387: 665–666.
- Morgan, M. J., and Trippel, E. A. 1996. Skewed sex ratios in spawning shoals of Atlantic cod (*Gadus morhua*). *ICES Journal of Marine Science*, 53: 820–826.
- Nash, R. D. M. 1998. Exploring the population dynamics of Irish Sea plaice, *Pleuronectes platessa* L., through the use of Paulik diagrams. *Journal of Sea Research*, 40: 1–18.
- O'Connell, M., Dillon, M. C., Wright, J. M., Bentzen, P., Merkouris, S., and Seeb, J. 1998. Genetic structure among Alaskan Pacific herring populations identified using microsatellite variation. *Journal of Fish Biology*, 53: 150–163.
- O'Reilly, P. T., Canino, M. F., Bailey, K. M., and Bentzen, P. 2004. Inverse relationship between  $F_{ST}$  and microsatellite polymorphism in the marine fish, walleye pollock (*Theragra chalcogramma*): implications for resolving weak population structure. *Molecular Ecology*, 13: 1799–1814.
- Pampoulie, C., Steingrund, P., Stefánsson, M. Ö., and Danielsdóttir, A. K. 2007. Genetic divergence among East Icelandic and Faroese populations of Atlantic cod provides evidence for historical imprints at neutral and non-neutral markers. *ICES Journal of Marine Science*, 65: 65–71.
- Pogson, G. H., Taggart, C. T., Mesa, K. A., and Boutilier, R. G. 2001. Isolation by distance in the Atlantic cod, *Gadus morhua*, at large and small geographic scales. *Evolution*, 55: 131–146.
- Raymond, M., and Rousset, F. 1995. GENEPOP, Version 1.2. Population genetics software for exact tests and ecumenicisms. *Journal of Heredity*, 86: 249–249.
- Rice, W. R. 1989. Analyzing tables of statistical tests. *Evolution*, 43: 223–225.
- Rousset, F. 1997. Genetic differentiation and estimation of gene flow from *F*-statistics under isolation by distance. *Genetics*, 145: 1219–1228.
- Rowe, S., Hutchings, J. A., Bekkevold, D., and Rakinin, A. 2004. Depensation, probability of fertilization, and the mating system of Atlantic cod (*Gadus morhua* L.). *ICES Journal of Marine Science*, 61: 1144–1150.
- Ruzzante, D. E., Taggart, C. T., and Cook, D. 1996. Spatial and temporal variation in the genetic composition of a larval cod (*Gadus morhua*) aggregation: cohort contribution and genetic stability. *Canadian Journal of Fisheries and Aquatic Sciences*, 53: 2965–2705.
- Ruzzante, D. E., Taggart, C. T., Cook, D., and Goddard, S. V. 1997. Genetic differentiation between inshore and offshore Atlantic cod (*Gadus morhua* L.) off Newfoundland: a test and evidence of



temporal stability. *Canadian Journal of Fisheries and Aquatic Sciences*, 54: 2700–2708.

Saccheri, I., Kuussaari, M., Kankare, M., Vikman, P., Fortelius, W., and Hanski, I. 1998. Inbreeding and extinction in a butterfly metapopulation. *Nature*, 392: 491–494.

Sambrook, J., and Russell, D. W. 2000. *Molecular Cloning: a Laboratory Manual*, 3rd edn. Cold Spring Harbour Press, Cold Spring Harbour.

Shaw, P. W., Turan, C., Wright, J. M., O’Connell, M., and Carvalho, G. R. 1999. Microsatellite DNA analysis of population structure in Atlantic herring (*Clupea harengus*), with direct comparison to allozyme and mtDNA RFLP analyses. *Heredity*, 83: 490–499.

Slatkin, M. 1993. Isolation by distance in equilibrium and non-equilibrium populations. *Evolution*, 47: 264–279.

Turner, T. F., Wares, J. P., and Gold, J. R. 2002. Genetic effective size is three orders of magnitude smaller than adult census size in an abundant, estuarine-dependent marine fish (*Sciaenops ocellatus*). *Genetics*, 162: 1329–1339.

van der Molen, J., Rogers, S. I., Ellis, J. R., Fox, C. J., and McCloghrie, P. 2007. Dispersal patterns of the eggs and larvae of spring-spawning fish in the Irish Sea, UK. *Journal of Sea Research*, 58: 313–330.

Van Oosterhout, C., Hutchinson, B., Wills, D., and Shipley, P. 2003. MICROCHECKER, microsatellite data checking software. <http://www.microchecker.hull.ac.uk>

Vekemans, X., and Hardy, O. J. 2004. New insights from fine-scale spatial genetic structure analyses in plant populations. *Molecular Ecology*, 13: 921–235.

Vigliola, L., Doherty, P. J., Meekan, M. G., Drown, D. M., Jones, M. E., and Barber, P. H. 2007. Genetic identity determines risk of post-settlement mortality of a marine fish. *Ecology*, 88: 1263–1277.

Walters, C. J., and Martell, S. J. D. 2004. *Fisheries Ecology and Management*. Princeton University Press, Princeton, NJ. 399 pp.

Waples, R. S. 1998. Separating the wheat from the chaff: patterns of genetic differentiation in high gene flow species. *Journal of Heredity*, 89: 438–450.

Waples, R. S. 2006. A bias correction for estimates of effective population size based on linkage disequilibrium at unlinked gene loci. *Conservation Genetics*, 7: 167–184.

Waples, R. S., and Do, C. 2008. LDNE: a program for estimating effective population size from data on linkage disequilibrium. *Molecular Ecology Notes*, 8: 753–756.

Watts, P. C., Nash, R. D. M., George, S. G., and Kemp, S. J. 1999. Isolation and characterisation of microsatellite loci in the European plaice, *Pleuronectes platessa* L. (Teleostei: Pleuronectidae). *Molecular Ecology*, 8: 2151–2152.

Watts, P. C., Nash, R. D. M., and Kemp, S. J. 2001. Polymorphic microsatellite loci in the European plaice, *Pleuronectes platessa* L., and their utility in flounder, lemon sole and Dover sole. *Journal of the Marine Biological Association of the UK*, 81: 367–368.

Watts, P. C., Nash, R. D. M., and Kemp, S. J. 2004. Genetic structure of juvenile plaice, *Pleuronectes platessa*, on nursery grounds in the Irish Sea. *Journal of Sea Research*, 51: 191–197.

Watts, P. C., Rousset, F., Saccheri, I. J., Leblois, R., Kemp, S. J., and Thompson, D. J. 2007a. Compatible genetic and ecological estimates of dispersal rates in insect (*Coenagrion mercuriale*: Odonata: Zygoptera) populations: analysis of “neighbourhood size” using a more precise estimator. *Molecular Ecology*, 16: 737–751.

Watts, P. C., Saccheri, I. J., Kemp, S. J., and Thompson, D. J. 2007b. Effective population sizes and migration rates in fragmented populations of an endangered insect (*Coenagrion mercuriale*: Odonata). *Journal of Animal Ecology*, 76: 790–800.

Weir, B. S., and Cockerham, C. C. 1984. Estimating *F*-statistics for the analysis of population structure. *Evolution*, 38: 1358–1370.

Wright, S. 1943. Isolation by distance. *Genetics*, 28: 114–138.

Wright, S. 1951. The genetical structure of populations. *Annals of Eugenics*, 15: 323–354.

## Appendix

Sample sizes and basic measure of genetic variation at six unlinked microsatellite loci for samples of plaice (*P. platessa*) from the west coast of Great Britain

|      | Sample | <i>n</i> | LIST1-001            |                      |          | LIST1-003            |                      |          | LIST1-007            |                      |          | LIST1-010            |                      |          | PI92                 |                      |          | PI115                |                      |          |
|------|--------|----------|----------------------|----------------------|----------|----------------------|----------------------|----------|----------------------|----------------------|----------|----------------------|----------------------|----------|----------------------|----------------------|----------|----------------------|----------------------|----------|
|      |        |          | <i>H<sub>e</sub></i> | <i>N<sub>a</sub></i> | <i>f</i> | <i>H<sub>e</sub></i> | <i>N<sub>a</sub></i> | <i>f</i> | <i>H<sub>e</sub></i> | <i>N<sub>a</sub></i> | <i>f</i> | <i>H<sub>e</sub></i> | <i>N<sub>a</sub></i> | <i>f</i> | <i>H<sub>e</sub></i> | <i>N<sub>a</sub></i> | <i>f</i> | <i>H<sub>e</sub></i> | <i>N<sub>a</sub></i> | <i>f</i> |
| 2001 | ARD    | 15       | 0.591                | 6                    | −0.016   | 0.260                | 6                    | −0.077   | 0.404                | 4                    | −0.188   | 0.524                | 3                    | −0.374   | 0.894                | 18                   | 0.150*   | 0.714                | 10                   | 0.160    |
|      | AYR    | 20       | 0.625                | 4                    | −0.280   | 0.625                | 4                    | −0.280   | 0.200                | 2                    | 0.000    | 0.550                | 2                    | 0.273    | 0.975                | 6                    | 0.590*   | 0.375                | 3                    | −0.067   |
|      | CCH    | 11       | 0.723                | 4                    | −0.132   | 0.405                | 4                    | 0.326    | 0.391                | 3                    | −0.163   | 0.518                | 2                    | −0.228   | 0.959                | 12                   | 0.336*   | 0.523                | 5                    | −0.217   |
|      | CSW    | 12       | 0.695                | 4                    | −0.055   | 0.576                | 6                    | 0.306    | 0.500                | 5                    | 0.200    | 0.510                | 2                    | 0.738*   | 0.876                | 10                   | 0.239*   | 0.643                | 10                   | 0.170    |
|      | FIR    | 25       | 0.617                | 5                    | 0.027    | 0.583                | 5                    | 0.314    | 0.372                | 4                    | 0.463    | 0.633                | 3                    | 0.684*   | 0.917                | 8                    | 0.515*   | 0.594                | 6                    | 0.495*   |
|      | GAN    | 26       | 0.673                | 4                    | −0.029   | 0.077                | 2                    | 0.000    | 0.538                | 4                    | −0.143   | 0.494                | 2                    | 0.065    | 0.917                | 13                   | −0.007   | 0.619                | 7                    | 0.130    |
|      | GLE    | 10       | 0.709                | 6                    | −0.026   | 0.595                | 6                    | 0.084    | 0.464                | 3                    | 0.608*   | 0.636                | 3                    | 0.286    | 0.933                | 11                   | 0.250*   | 0.786                | 7                    | −0.040   |
|      | GRU    | 5        | 0.581                | 5                    | 0.174    | 0.432                | 7                    | −0.070   | 0.289                | 3                    | −0.154   | 0.525                | 3                    | −0.246   | 0.909                | 17                   | 0.154*   | 0.613                | 13                   | −0.045   |
|      | KEN    | 15       | 0.638                | 6                    | 0.035    | 0.535                | 8                    | −0.007   | 0.535                | 4                    | −0.078   | 0.506                | 2                    | −0.064   | 0.856                | 15                   | 0.236*   | 0.719                | 12                   | 0.144    |
|      | LOC    | 5        | 0.492                | 3                    | 0.154    | 0.436                | 5                    | 0.043    | 0.485                | 4                    | 0.141    | 0.500                | 2                    | −0.333   | 0.860                | 9                    | 0.225    | 0.765                | 8                    | 0.020    |
|      | SAL    | 11       | 0.675                | 4                    | −0.481   | 0.375                | 3                    | −0.067   | 0.550                | 2                    | 0.273    | 0.550                | 2                    | −0.091   | 0.950                | 7                    | 0.158    | 0.725                | 5                    | −0.379   |
| TOR  | 11     | 0.743    | 6                    | 0.462*               | 0.450    | 4                    | 0.667*               | 0.629    | 4                    | 0.364*               | 0.667    | 3                    | 0.368*               | 0.829    | 14                   | 0.111                | 0.751    | 11                   | 0.468*               |          |
| TRA  | 26     | 0.441    | 3                    | 0.175                | 0.255    | 3                    | −0.071               | 0.473    | 4                    | 0.231                | 0.527    | 2                    | 0.310                | 0.782    | 9                    | −0.047               | 0.845    | 10                   | 0.032                |          |
| 2001 | ZO1    | 16       | 0.680                | 4                    | 0.095    | 0.489                | 7                    | 0.056    | 0.425                | 4                    | −0.205   | 0.516                | 3                    | −0.142   | 0.877                | 18                   | 0.064    | 0.607                | 12                   | 0.177*   |
|      | ZO2    | 33       | 0.657                | 5                    | 0.060    | 0.429                | 6                    | −0.093   | 0.504                | 4                    | 0.008    | 0.506                | 2                    | −0.019   | 0.880                | 19                   | 0.219*   | 0.795                | 13                   | 0.136    |
|      | ZO3    | 24       | 0.694                | 5                    | −0.002   | 0.414                | 7                    | 0.056    | 0.438                | 5                    | 0.106    | 0.510                | 3                    | 0.233    | 0.877                | 21                   | 0.133*   | 0.689                | 14                   | 0.148*   |
|      | ZO5    | 46       | 0.512                | 5                    | 0.186    | 0.395                | 6                    | −0.055   | 0.408                | 4                    | −0.124   | 0.511                | 2                    | 0.021    | 0.876                | 13                   | 0.057    | 0.743                | 13                   | 0.159    |
|      | ZO5    | 34       | 0.657                | 6                    | −0.015   | 0.524                | 9                    | 0.016    | 0.405                | 4                    | 0.028    | 0.536                | 4                    | −0.188   | 0.891                | 18                   | 0.116*   | 0.655                | 9                    | 0.306*   |
|      | ZO6    | 39       | 0.792                | 8                    | −0.026   | 0.660                | 8                    | 0.338*   | 0.385                | 5                    | −0.135   | 0.696                | 5                    | 0.281    | 0.815                | 9                    | 0.079    | 0.744                | 12                   | 0.076    |

Continued

Continued

|      | Sample | <i>n</i> | LIST1-001 |       |          | LIST1-003 |       |          | LIST1-007 |       |               | LIST1-010 |       |          | PI92  |       |               | PI115 |       |               |
|------|--------|----------|-----------|-------|----------|-----------|-------|----------|-----------|-------|---------------|-----------|-------|----------|-------|-------|---------------|-------|-------|---------------|
|      |        |          | $H_e$     | $N_a$ | <i>f</i> | $H_e$     | $N_a$ | <i>f</i> | $H_e$     | $N_a$ | <i>f</i>      | $H_e$     | $N_a$ | <i>f</i> | $H_e$ | $N_a$ | <i>f</i>      | $H_e$ | $N_a$ | <i>f</i>      |
| 2002 | ALD    | 21       | 0.607     | 5     | -0.301   | 0.332     | 5     | -0.110   | 0.329     | 4     | -0.120        | 0.507     | 3     | -0.245   | 0.886 | 13    | 0.050         | 0.752 | 11    | 0.113         |
|      | AUC    | 16       | 0.547     | 5     | -0.023   | 0.385     | 6     | 0.004    | 0.403     | 4     | 0.059         | 0.506     | 3     | -0.004   | 0.884 | 18    | <b>0.181*</b> | 0.558 | 13    | 0.134*        |
|      | BEC    | 22       | 0.591     | 5     | -0.073   | 0.491     | 8     | 0.055    | 0.325     | 4     | 0.099         | 0.530     | 4     | 0.080    | 0.890 | 18    | 0.150*        | 0.720 | 15    | 0.052         |
|      | BLA    | 23       | 0.574     | 5     | -0.054   | 0.429     | 6     | 0.080    | 0.396     | 4     | 0.069         | 0.508     | 2     | 0.223    | 0.880 | 18    | <b>0.222*</b> | 0.712 | 12    | 0.002         |
|      | FLE    | 22       | 0.603     | 4     | -0.245   | 0.314     | 5     | -0.113   | 0.388     | 4     | 0.098         | 0.538     | 3     | 0.071    | 0.846 | 13    | 0.232*        | 0.650 | 9     | 0.077         |
|      | MOR    | 24       | 0.740     | 5     | 0.070    | 0.387     | 4     | 0.631*   | 0.335     | 4     | -0.118        | 0.505     | 2     | -0.585   | 0.892 | 14    | 0.019         | 0.724 | 7     | 0.447*        |
|      | NWB    | 21       | 0.654     | 4     | -0.113   | 0.576     | 7     | -0.026   | 0.404     | 5     | <b>0.550*</b> | 0.530     | 3     | -0.114   | 0.935 | 20    | -0.069        | 0.588 | 9     | 0.072         |
|      | PEN    | 24       | 0.576     | 5     | -0.026   | 0.255     | 6     | -0.068   | 0.449     | 4     | 0.494*        | 0.459     | 2     | -0.090   | 0.890 | 13    | 0.029         | 0.735 | 11    | 0.072         |
|      | RWB    | 29       | 0.598     | 4     | -0.018   | 0.468     | 5     | -0.167   | 0.344     | 5     | 0.241         | 0.488     | 2     | 0.109    | 0.921 | 15    | 0.112         | 0.629 | 12    | 0.240*        |
|      | RHY    | 19       | 0.546     | 5     | 0.176    | 0.429     | 5     | -0.049   | 0.429     | 5     | 0.184         | 0.517     | 3     | 0.420*   | 0.916 | 18    | 0.072         | 0.689 | 11    | 0.275*        |
|      | SAN    | 23       | 0.699     | 5     | -0.120   | 0.477     | 6     | -0.002   | 0.439     | 4     | 0.108         | 0.551     | 4     | 0.133    | 0.863 | 18    | -0.008        | 0.649 | 9     | <b>0.397*</b> |
|      | SEA    | 20       | 0.645     | 5     | -0.008   | 0.415     | 7     | -0.032   | 0.191     | 4     | -0.048        | 0.505     | 2     | -0.188   | 0.892 | 15    | -0.065        | 0.710 | 8     | 0.262*        |
|      | SIL    | 23       | 0.603     | 4     | 0.062    | 0.405     | 4     | 0.034    | 0.399     | 5     | 0.129         | 0.555     | 4     | 0.139    | 0.923 | 20    | 0.011         | 0.687 | 9     | 0.177         |
|      | SOU    | 17       | 0.640     | 5     | -0.171   | 0.540     | 6     | -0.003   | 0.415     | 4     | 0.096         | 0.548     | 3     | 0.088    | 0.929 | 21    | 0.058         | 0.624 | 11    | -0.001        |
| 2003 | BEC    | 41       | 0.531     | 3     | -0.107   | 0.272     | 4     | -0.081   | 0.399     | 3     | -0.032        | 0.518     | 2     | 0.319    | 0.926 | 15    | -0.079        | 0.833 | 12    | 0.294*        |
|      | FLE    | 19       | 0.651     | 4     | -0.024   | 0.344     | 7     | -0.107   | 0.538     | 4     | -0.062        | 0.525     | 3     | -0.270   | 0.911 | 17    | 0.059         | 0.765 | 9     | 0.005         |
|      | NWB    | 60       | 0.472     | 4     | -0.115   | 0.439     | 4     | -0.080   | 0.364     | 4     | -0.157        | 0.515     | 2     | 0.182    | 0.876 | 11    | 0.038         | 0.808 | 11    | 0.219*        |
|      | SAN    | 38       | 0.664     | 4     | -0.004   | 0.572     | 7     | -0.094   | 0.383     | 4     | -0.087        | 0.509     | 2     | -0.146   | 0.862 | 17    | 0.082         | 0.791 | 13    | 0.262*        |
|      | SIL    | 20       | 0.591     | 4     | -0.051   | 0.557     | 8     | 0.196    | 0.355     | 4     | 0.029         | 0.501     | 2     | -0.238   | 0.923 | 20    | -0.009        | 0.769 | 16    | 0.118         |
|      | All    | 866      |           | 13    |          |           | 11    |          |           | 8     |               | 8         |       |          | 61    |       |               |       | 23    |               |

*n*, sample size;  $H_e$ , expected heterozygosity;  $N_a$ , number of alleles; *f*, inbreeding coefficient (Wright, 1951). ZO, Zone (Figure 1).

\* Significant ( $p < 0.05$ ) deviations from expected Hardy-Weinberg conditions, with tests that remain significant after Bonferroni correction highlighted emboldened.

doi:10.1093/icesjms/fsp274
